# Supplementary material for: Amino Acid and Phospholipid Metabolism as an Indicator of Inflammation and Subtle Cardiomyopathy in Patients with Marfan Syndrome
Source: MDPI journal article supplement (doi:10.3390/metabo11120805), 2021-11-27
Supplement: s1 [file s1]

## Supplemental tables

**Table S1 a-c.** Values of amino acids, of biogenic amines and their derivatives, and of selected sums and ratios for all three groups.

Metabolite concentrations ([ $\mu\text{mol/l}$ ]) for all analytes with selected sums and ratios, grouped by Marfan patients *vs.* controls. Values are given as mean  $\pm$  standard deviation. False discovery rate-corrected  $p$  ( $=q$ )  $< 0.05$  was considered statistically significant. Group A, all patients; group AF, patients with preserved systolic ventricular function; group AFV, patients with preserved systolic ventricular function and without major valve regurgitation. FC, fold change (Marfan patients *vs.* controls); HMDB ID, Human Metabolome Database identification; AA, amino acids; AAA, aromatic amino acids; Ac-Orn, acethylornithine; ADMA, asymmetric dimethylarginine; alpha-AAA, alpha aminoadipic acid; Arg, arginine; BCAA, branched-chain amino acids; lysoPC, lysophosphatidylcholine; orn, ornithine; PC, phosphatidylcholine; SM, sphingomyelin;  $\uparrow$ , statistically significant higher serum concentration in Marfan patients than in controls;  $\downarrow$ , statistically significant lower serum concentration in Marfan patients than in controls. ‘Fischer ratio’ is the ratio of BCAA/AAA.

**Table S1 a.** Values of amino acids, of biogenic amines and their derivatives, and of selected sums and ratios – all patients (group A).

| Metabolite       | HMDB ID                                                | Patients                   | Controls                   | p           | q           | FC         |
|------------------|--------------------------------------------------------|----------------------------|----------------------------|-------------|-------------|------------|
| ADMA             | HMDB01539                                              | 0.54 $\pm$ 0.12            | 0.48 $\pm$ 0.13            | 0.14        | 0.56        | 1.11       |
| Alanine          | HMDB00161<br>HMDB01310                                 | 390 $\pm$ 90               | 400 $\pm$ 110              | 0.72        | 0.90        | 0.98       |
| Arginine         | HMDB00517<br>HMDB03416                                 | 118 $\pm$ 14               | 120 $\pm$ 20               | 0.64        | 0.85        | 0.98       |
| Asparagine       | HMDB00168<br>HMDB003378                                | 48 $\pm$ 10                | 48 $\pm$ 8                 | 0.90        | 0.96        | 0.99       |
| Aspartic acid    | HMDB00191<br>HMDB06483                                 | 19 $\pm$ 3                 | 20 $\pm$ 4                 | 0.40        | 0.70        | 0.96       |
| C0               | HMDB00062                                              | 36 $\pm$ 8                 | 33 $\pm$ 5                 | 0.16        | 0.57        | 1.08       |
| C14:1            | HMDB0002014                                            | 0.14 $\pm$ 0.05            | 0.13 $\pm$ 0.03            | 0.60        | 0.85        | 1.04       |
| C18:1            | HMDB0006351<br>HMDB0005065<br>HMDB06464<br>HMDB0013338 | 0.15 $\pm$ 0.05            | 0.14 $\pm$ 0.03            | 0.44        | 0.70        | 1.07       |
| C18:2            | HMDB0006469<br>HMDB0006461                             | 0.053 $\pm$ 0.019          | 0.049 $\pm$ 0.017          | 0.43        | 0.70        | 1.08       |
| C2               | HMDB00201                                              | 7 $\pm$ 3                  | 6.4 $\pm$ 1.6              | 0.61        | 0.85        | 1.05       |
| Citrulline       | HMDB00904                                              | 30 $\pm$ 9                 | 32 $\pm$ 7                 | 0.47        | 0.72        | 0.95       |
| Creatinine       | HMDB0000562                                            | 72 $\pm$ 16                | 83 $\pm$ 14                | 0.02        | 0.38        | 0.88       |
| Glutamine        | HMDB00641<br>HMDB03423                                 | 740 $\pm$ 90               | 730 $\pm$ 100              | 0.91        | 0.96        | 1.00       |
| Glutamic acid    | HMDB00148<br>HMDB03339                                 | 45 $\pm$ 22                | 32 $\pm$ 20                | 0.03        | 0.39        | 1.43       |
| Glycine          | HMDB00123                                              | 260 $\pm$ 50               | 310 $\pm$ 80               | 0.03        | 0.39        | 0.87       |
| H1               |                                                        | 3800 $\pm$ 1300            | 3700 $\pm$ 500             | 0.87        | 0.95        | 1.01       |
| <b>Histidine</b> | <b>HMDB00177</b>                                       | <b>78<math>\pm</math>9</b> | <b>87<math>\pm</math>7</b> | <b>0.00</b> | <b>0.01</b> | <b>0.9</b> |
| Isoleucine       | HMDB00172<br>HMDB0000557                               | 70 $\pm$ 14                | 74 $\pm$ 13                | 0.38        | 0.70        | 0.95       |

|                   |                                                                       |            |            |      |      |      |
|-------------------|-----------------------------------------------------------------------|------------|------------|------|------|------|
| Kynurenine        | HMDB00684                                                             | 4.4+-0.7   | 4.8+-0.8   | 0.11 | 0.56 | 0.92 |
| Leucine           | HMDB00687<br>HMDB0013773                                              | 100+-30    | 110+-30    | 0.22 | 0.62 | 0.90 |
| Lysine            | HMDB00182<br>HMDB03405                                                | 350+-40    | 320+-50    | 0.02 | 0.38 | 1.10 |
| lysoPC a<br>C16:0 | HMDB10382<br>HMDB0061702                                              | 83+-13     | 83+-16     | 0.92 | 0.96 | 1.01 |
| lysoPC a<br>C16:1 | HMDB0010383                                                           | 3+-1.1     | 3.2+-0.8   | 0.42 | 0.70 | 0.93 |
| lysoPC a<br>C17:0 | HMDB12108                                                             | 7+-1       | 7.4+-1.6   | 0.27 | 0.67 | 0.94 |
| lysoPC a<br>C18:0 | HMDB10384<br>HMDB0011128                                              | 28+-6      | 28+-5      | 0.95 | 0.96 | 1.00 |
| lysoPC a<br>C18:1 | HMDB02815<br>HMDB0010385<br>HMDB0061701                               | 23+-6      | 26+-8      | 0.14 | 0.56 | 0.89 |
| lysoPC a<br>C18:2 | HMDB10386<br>HMDB0061700                                              | 32+-9      | 37+-15     | 0.19 | 0.57 | 0.87 |
| lysoPC a<br>C20:3 | HMDB10394<br>HMDB0010393                                              | 3.1+-1     | 3+-0.8     | 0.89 | 0.96 | 1.01 |
| lysoPC a<br>C20:4 | HMDB10395<br>HMDB0010396                                              | 8.4+-2     | 8+-3       | 0.64 | 0.85 | 1.04 |
| lysoPC a<br>C28:0 | HMDB29206                                                             | 0.5+-0.3   | 0.6+-0.3   | 0.23 | 0.62 | 0.81 |
| lysoPC a<br>C28:1 | HMDB0029221                                                           | 0.6+-0.4   | 0.8+-0.4   | 0.02 | 0.38 | 0.65 |
| Methionine        | HMDB00696                                                             | 29+-4      | 31+-4      | 0.18 | 0.57 | 0.95 |
| Ornithine         | HMDB00214<br>HMDB03374                                                | 39+-17     | 46+-23     | 0.23 | 0.62 | 0.85 |
| PC aa C28:1       | HMDB0007867<br>HMDB0007899                                            | 2.9+-0.7   | 3.3+-0.7   | 0.12 | 0.56 | 0.90 |
| PC aa C30:0       | HMDB0007934<br>HMDB0007869<br>HMDB0007965                             | 12+-3      | 12.1+-2.2  | 0.85 | 0.95 | 1.01 |
| PC aa C30:2       | HMDB0007999                                                           | 1.21+-0.23 | 1.1+-0.3   | 0.19 | 0.57 | 1.08 |
| PC aa C32:0       | HMDB00564<br>HMDB0007871<br>HMDB0008031                               | 14+-4      | 13+-3      | 0.39 | 0.70 | 1.06 |
| PC aa C32:1       | HMDB0007872<br>HMDB0007873<br>HMDB0008097<br>HMDB0007969              | 17+-10     | 17+-7      | 0.97 | 0.97 | 0.99 |
| PC aa C32:2       | HMDB0008002<br>HMDB0007874                                            | 4.6+-1.8   | 4.9+-1.7   | 0.46 | 0.71 | 0.92 |
| PC aa C32:3       | HMDB0007876                                                           | 0.7+-0.16  | 0.73+-0.13 | 0.40 | 0.70 | 0.95 |
| PC aa C34:1       | HMDB0007971<br>HMDB08100<br>HMDB0008035<br>HMDB0007972<br>HMDB0008003 | 240+-60    | 250+-50    | 0.70 | 0.90 | 0.97 |
| PC aa C34:2       | HMDB07973<br>HMDB0008101<br>HMDB0008133<br>HMDB0008005<br>HMDB0008004 | 390+-50    | 390+-70    | 0.92 | 0.96 | 1.00 |

|             |                                                                                                                                                  |            |            |      |      |      |
|-------------|--------------------------------------------------------------------------------------------------------------------------------------------------|------------|------------|------|------|------|
| PC aa C34:3 | HMDB08006<br>HMDB0007974<br>HMDB0007975                                                                                                          | 13+-4      | 15+-6      | 0.18 | 0.57 | 0.87 |
| PC aa C34:4 | HMDB0007883<br>HMDB0007976                                                                                                                       | 1.9+-0.9   | 1.9+-0.7   | 0.87 | 0.95 | 0.98 |
| PC aa C36:0 | HMDB0008265<br>HMDB0008036<br>HMDB0008525<br>HMDB0007886                                                                                         | 5.8+-1.2   | 5.9+-1.1   | 0.73 | 0.90 | 0.98 |
| PC aa C36:1 | HMDB08038<br>HMDB0008069<br>HMDB0007978<br>HMDB0008102                                                                                           | 61+-14     | 65+-13     | 0.40 | 0.70 | 0.95 |
| PC aa C36:2 | HMDB08039<br>HMDB0008070<br>HMDB08135<br>HMDB0007979                                                                                             | 230+-40    | 230+-40    | 0.94 | 0.96 | 1.00 |
| PC aa C36:3 | HMDB08105<br>HMDB0007980<br>HMDB0007981<br>HMDB0008040                                                                                           | 133+-25    | 130+-30    | 0.82 | 0.95 | 0.99 |
| PC aa C36:4 | HMDB07982<br>HMDB0008107<br>HMDB0008138<br>HMDB0008234<br>HMDB0008429<br>HMDB0008170<br>HMDB0008138<br>HMDB0008042<br>HMDB0008203<br>HMDB0008106 | 170+-40    | 160+-30    | 0.12 | 0.56 | 1.10 |
| PC aa C36:5 | HMDB07984<br>HMDB0008015                                                                                                                         | 20+-13     | 20+-12     | 0.85 | 0.95 | 0.97 |
| PC aa C36:6 | HMDB0008206<br>HMDB0007892                                                                                                                       | 0.8+-0.4   | 0.9+-0.4   | 0.51 | 0.77 | 0.92 |
| PC aa C38:0 | HMDB0007893<br>HMDB0008528<br>HMDB0008043<br>HMDB0008755<br>HMDB0008267<br>HMDB0007985                                                           | 3.4+-0.6   | 3.2+-0.7   | 0.42 | 0.70 | 1.05 |
| PC aa C38:1 | HMDB0007894<br>HMDB0008269<br>HMDB0007986<br>HMDB0008268<br>HMDB0008109<br>HMDB0008044                                                           | 0.13+-0.18 | 0.23+-0.25 | 0.11 | 0.56 | 0.56 |
| PC aa C38:3 | HMDB0008020<br>HMDB0008046<br>HMDB0008047                                                                                                        | 50+-12     | 47+-11     | 0.30 | 0.70 | 1.07 |
| PC aa C38:4 | HMDB0008048<br>HMDB0008112<br>HMDB0008113<br>HMDB0007988                                                                                         | 101+-23    | 85+-17     | 0.01 | 0.35 | 1.18 |

|             |                                                                                                                                                                                                 |            |            |      |      |      |
|-------------|-------------------------------------------------------------------------------------------------------------------------------------------------------------------------------------------------|------------|------------|------|------|------|
| PC aa C38:5 | HMDB0007990<br>HMDB0007989<br>HMDB0008050<br>HMDB0008114                                                                                                                                        | 51+-11     | 48+-11     | 0.43 | 0.70 | 1.05 |
| PC aa C38:6 | HMDB0008725<br>HMDB0008116<br>HMDB0008434<br>HMDB0007991<br>HMDB0008147<br>HMDB0008083<br>HMDB0008499                                                                                           | 61+-15     | 59+-16     | 0.75 | 0.90 | 1.03 |
| PC aa C40:2 | HMDB0008308<br>HMDB0008276                                                                                                                                                                      | 0.45+-0.08 | 0.42+-0.11 | 0.34 | 0.70 | 1.06 |
| PC aa C40:3 | HMDB0008278<br>HMDB0008277<br>HMDB0008086<br>HMDB0008119                                                                                                                                        | 0.77+-0.13 | 0.76+-0.12 | 0.71 | 0.90 | 1.02 |
| PC aa C40:4 | HMDB0008279<br>HMDB0008628<br>HMDB0008054                                                                                                                                                       | 4+-1       | 3.6+-0.8   | 0.08 | 0.56 | 1.13 |
| PC aa C40:5 | HMDB0008056<br>HMDB0008055<br>HMDB0008120                                                                                                                                                       | 9.8+-2.1   | 8.6+-2     | 0.05 | 0.51 | 1.13 |
| PC aa C40:6 | HMDB08057<br>HMDB0008089                                                                                                                                                                        | 20+-5      | 18+-4      | 0.17 | 0.57 | 1.11 |
| PC aa C42:0 | HMDB0008537<br>HMDB0008760<br>HMDB0008282<br>HMDB0008058                                                                                                                                        | 0.46+-0.1  | 0.48+-0.09 | 0.34 | 0.70 | 0.95 |
| PC aa C42:1 | HMDB0008762<br>HMDB0008124<br>HMDB0008283<br>HMDB0008538<br>HMDB0008059                                                                                                                         | 0.26+-0.09 | 0.28+-0.08 | 0.45 | 0.71 | 0.93 |
| PC aa C42:2 | HMDB0008157<br>HMDB0008795<br>HMDB0008125<br>HMDB0008763<br>HMDB0008092<br>HMDB0008316<br>HMDB0008794<br>HMDB0008602<br>HMDB0008284<br>HMDB0008348<br>HMDB0008539<br>HMDB0011330<br>HMDB0008570 | 0.25+-0.06 | 0.24+-0.07 | 0.70 | 0.90 | 1.03 |
| PC aa C42:4 | HMDB0008191                                                                                                                                                                                     | 0.26+-0.09 | 0.23+-0.08 | 0.25 | 0.64 | 1.13 |
| PC aa C42:5 | HMDB08287                                                                                                                                                                                       | 0.33+-0.09 | 0.35+-0.11 | 0.54 | 0.79 | 0.95 |
| PC aa C42:6 | HMDB0008288                                                                                                                                                                                     | 0.42+-0.09 | 0.41+-0.14 | 0.61 | 0.85 | 1.04 |
| PC ae C30:0 | HMDB0013341                                                                                                                                                                                     | 0.55+-0.21 | 0.61+-0.11 | 0.09 | 0.56 | 0.90 |
| PC ae C30:1 | HMDB0013402                                                                                                                                                                                     | 0.72+-0.16 | 0.78+-0.11 | 0.16 | 0.57 | 0.93 |

|                    |                                           |                 |                   |             |             |             |
|--------------------|-------------------------------------------|-----------------|-------------------|-------------|-------------|-------------|
| PC ae C32:1        | HMDB0013404<br>HMDB0007896<br>HMDB0007994 | 2.6+-0.6        | 2.7+-0.5          | 0.33        | 0.70        | 0.94        |
| PC ae C32:2        | HMDB0013411                               | 1.2+-0.3        | 1.28+-0.23        | 0.58        | 0.82        | 0.96        |
| PC ae C34:0        | HMDB0013405                               | 1.9+-0.6        | 2+-0.5            | 0.38        | 0.70        | 0.93        |
| PC ae C34:1        | HMDB0013426                               | 9.2+-2.3        | 10.2+-1.9         | 0.13        | 0.56        | 0.91        |
| PC ae C34:2        | HMDB0011151                               | 10.6+-2.4       | 11.2+-2.2         | 0.37        | 0.70        | 0.95        |
| PC ae C34:3        | HMDB0013413                               | 8.1+-1.8        | 8.4+-1.9          | 0.57        | 0.82        | 0.96        |
| PC ae C36:0        | HMDB13406<br>HMDB0013417                  | 1.2+-0.3        | 1.34+-0.25        | 0.21        | 0.62        | 0.93        |
| PC ae C36:1        | HMDB0013427<br>HMDB0013414                | 7.6+-1.8        | 8.6+-1.6          | 0.06        | 0.51        | 0.89        |
| PC ae C36:2        | HMDB0013418<br>HMDB0013428<br>HMDB0011243 | 13+-3           | 14+-3             | 0.35        | 0.70        | 0.94        |
| PC ae C36:3        | HMDB0013429<br>HMDB0013425                | 8.1+-1.9        | 8.1+-1.5          | 0.96        | 0.97        | 1.00        |
| PC ae C36:4        | HMDB0013435<br>HMDB0013407                | 15+-4           | 13+-4             | 0.14        | 0.56        | 1.14        |
| PC ae C36:5        | HMDB0013415<br>HMDB0011220                | 31+-7           | 30+-5             | 0.74        | 0.90        | 1.02        |
| PC ae C38:0        | HMDB0013408<br>HMDB0013419                | 1.9+-0.5        | 2.1+-0.5          | 0.18        | 0.57        | 0.90        |
| PC ae C38:1        | HMDB0013419<br>HMDB0013408                | 1.4+-0.3        | 1.5+-0.3          | 0.03        | 0.39        | 0.88        |
| PC ae C38:2        | HMDB0013416<br>HMDB0013430                | 2.3+-0.5        | 2.6+-0.5          | 0.07        | 0.56        | 0.90        |
| PC ae C38:3        | HMDB0013436<br>HMDB0013431                | 4+-0.9          | 4.3+-0.7          | 0.31        | 0.70        | 0.94        |
| PC ae C38:4        | HMDB0013420                               | 13+-3           | 12.2+-2.1         | 0.53        | 0.79        | 1.04        |
| PC ae C38:5        | HMDB11253<br>HMDB0013432                  | 16+-3           | 15+-3             | 0.06        | 0.51        | 1.12        |
| PC ae C38:6        | HMDB0013409                               | 6.4+-1.3        | 5.9+-1.7          | 0.37        | 0.70        | 1.07        |
| PC ae C40:1        | HMDB0013433                               | 1.09+-0.21      | 1.2+-0.3          | 0.13        | 0.56        | 0.91        |
| PC ae C40:2        | HMDB0013437                               | 1.4+-0.3        | 1.6+-0.3          | 0.14        | 0.56        | 0.91        |
| PC ae C40:3        | HMDB0013445<br>HMDB0013446                | 1.03+-0.17      | 1.11+-0.16        | 0.07        | 0.56        | 0.92        |
| PC ae C40:4        | HMDB0013442                               | 2.1+-0.4        | 2.2+-0.4          | 0.71        | 0.90        | 0.98        |
| PC ae C40:5        | HMDB0013444                               | 3+-0.4          | 3+-0.5            | 0.81        | 0.95        | 0.99        |
| PC ae C40:6        | HMDB0013422                               | 3.7+-0.8        | 3.7+-0.8          | 0.93        | 0.96        | 0.99        |
| PC ae C42:1        | HMDB0013434<br>HMDB0013447                | 0.34+-0.07      | 0.32+-0.06        | 0.27        | 0.67        | 1.07        |
| PC ae C42:2        | HMDB0013438                               | 0.53+-0.13      | 0.57+-0.09        | 0.12        | 0.56        | 0.91        |
| <b>PC ae C42:3</b> | <b>HMDB0013458<br/>HMDB0013459</b>        | <b>0.7+-0.1</b> | <b>0.82+-0.12</b> | <b>0.00</b> | <b>0.03</b> | <b>0.86</b> |
| PC ae C44:3        | HMDB0013449<br>HMDB0013452                | 0.15+-0.06      | 0.15+-0.06        | 0.86        | 0.95        | 0.98        |
| PC ae C44:4        | HMDB0013455<br>HMDB0013453<br>HMDB0013460 | 0.46+-0.1       | 0.49+-0.11        | 0.32        | 0.70        | 0.94        |
| PC ae C44:5        | HMDB0013456                               | 1.6+-0.4        | 1.7+-0.4          | 0.17        | 0.57        | 0.91        |
| PC ae C44:6        | HMDB0013450<br>HMDB0013457                | 0.99+-0.17      | 1+-0.24           | 0.80        | 0.95        | 0.98        |

|                  |                            |                   |                  |             |             |             |
|------------------|----------------------------|-------------------|------------------|-------------|-------------|-------------|
| Phenylalanine    | HMDB00159                  | 66+-8             | 70+-22           | 0.34        | 0.70        | 0.93        |
| Proline          | HMDB00162<br>HMDB03411     | 230+-60           | 200+-40          | 0.11        | 0.56        | 1.12        |
| Putrescine       | HMDB01414                  | 0.16+-0.07        | 0.19+-0.06       | 0.14        | 0.56        | 0.85        |
| Serine           | HMDB00187<br>HMDB03406     | 117+-22           | 121+-20          | 0.45        | 0.71        | 0.96        |
| Serotonin        | HMDB00259                  | 0.8+-0.4          | 0.9+-0.4         | 0.39        | 0.70        | 0.89        |
| SM (OH)<br>C14:1 | HMDB0013462                | 5.8+-2            | 6.5+-1.6         | 0.23        | 0.62        | 0.90        |
| SM (OH)<br>C16:1 | HMDB0013463                | 4.2+-1.2          | 4.2+-0.9         | 0.81        | 0.95        | 0.98        |
| SM (OH)<br>C22:1 | HMDB0013466                | 17+-4             | 19+-4            | 0.30        | 0.70        | 0.94        |
| SM (OH)<br>C22:2 | HMDB0013467                | 14+-3             | 15+-3            | 0.19        | 0.57        | 0.92        |
| SM (OH)<br>C24:1 | HMDB0013469                | 1.8+-0.4          | 1.9+-0.5         | 0.62        | 0.85        | 0.96        |
| SM C16:0         | HMDB0061712<br>HMDB0010169 | 146+-22           | 140+-20          | 0.35        | 0.70        | 1.04        |
| SM C16:1         | HMDB0029216                | 21+-4             | 20+-3            | 0.35        | 0.70        | 1.05        |
| SM C18:0         | HMDB01348                  | 29+-7             | 28+-6            | 0.67        | 0.88        | 1.03        |
| SM C18:1         | HMDB0012100<br>HMDB0012101 | 14+-4             | 13+-3            | 0.44        | 0.70        | 1.06        |
| SM C20:2         |                            | 0.5+-0.18         | 0.5+-0.16        | 0.94        | 0.96        | 0.99        |
| SM C22:3         |                            | 2.7+-1.1          | 2.6+-1.1         | 0.85        | 0.95        | 1.02        |
| SM C24:0         | HMDB11697                  | 37+-6             | 36+-6            | 0.43        | 0.70        | 1.04        |
| SM C24:1         | HMDB12107                  | 70+-11            | 65+-11           | 0.14        | 0.56        | 1.08        |
| SM C26:0         | HMDB0011698                | 0.38+-0.15        | 0.41+-0.15       | 0.54        | 0.79        | 0.94        |
| SM C26:1         | HMDB0013461                | 0.44+-0.21        | 0.41+-0.15       | 0.63        | 0.85        | 1.06        |
| <b>Taurine</b>   | <b>HMDB00251</b>           | <b>61+-12</b>     | <b>83+-20</b>    | <b>0.00</b> | <b>0.01</b> | <b>0.74</b> |
| Threonine        | HMDB04041<br>HMDB00167     | 121+-24           | 130+-30          | 0.41        | 0.70        | 0.95        |
| Tryptophane      | HMDB00929<br>HMDB0013609   | 64+-13            | 70+-10           | 0.13        | 0.56        | 0.93        |
| Tyrosine         | HMDB00158                  | 69+-16            | 68+-12           | 0.78        | 0.93        | 1.02        |
| Valine           | HMDB00883                  | 240+-50           | 270+-50          | 0.03        | 0.39        | 0.89        |
| BCAA             |                            | 416+-87           | 460+-85          |             |             |             |
| AAA              |                            | 277+-30           | 295+-33          |             |             |             |
| Fischer ratio    |                            | 1.5+-0.25         | 1.57+-0.27       |             |             |             |
| ADMA/Arg         |                            | 0.0046+-<br>0.001 | 0.004+-<br>0.001 |             |             |             |
| Cit/Arg          |                            | 0.26+-0.07        | 0.27+-0.05       |             |             |             |
| Cit/Orn          |                            | 0.94+-0.49        | 1.3+-2.3         |             |             |             |
| Orn/Arg          |                            | 0.33+-0.14        | 0.39+-0.21       |             |             |             |

**Table S1 b.** Values of amino acids, of biogenic amines and their derivatives, and of selected sums and ratios – patients with preserved systolic ventricular function (group AF).

| Metabolite        | HMBD ID                                                | Patients        | Controls         | p           | q           | FC          |
|-------------------|--------------------------------------------------------|-----------------|------------------|-------------|-------------|-------------|
| ADMA              | HMDB01539                                              | 0.54+-0.12      | 0.48+-0.13       | 0.12        | 0.73        | 1.13        |
| Alanine           | HMDB00161<br>HMDB01310                                 | 400+-90         | 390+-80          | 0.59        | 0.84        | 1.03        |
| Arginine          | HMDB00517<br>HMDB03416                                 | 119+-14         | 119+-20          | 0.87        | 0.96        | 0.99        |
| Asparagine        | HMDB00168<br>HMDB003378                                | 48+-10          | 48+-9            | 0.94        | 0.98        | 1.00        |
| Aspartic acid     | HMDB00191<br>HMDB06483                                 | 18.8+-2.4       | 20+-4            | 0.36        | 0.83        | 0.94        |
| C0                | HMDB00062                                              | 36+-7           | 33+-5            | 0.10        | 0.73        | 1.10        |
| C14:1             | HMDB0002014                                            | 0.14+-0.05      | 0.13+-0.03       | 0.71        | 0.90        | 1.03        |
| C18:1             | HMDB0006351<br>HMDB0005065<br>HMDB06464<br>HMDB0013338 | 0.15+-0.05      | 0.14+-0.03       | 0.57        | 0.84        | 1.05        |
| C18:2             | HMDB0006469<br>HMDB0006461                             | 0.053+-<br>0.02 | 0.049+-<br>0.018 | 0.50        | 0.84        | 1.08        |
| C2                | HMDB00201                                              | 7+-3            | 6.5+-1.7         | 0.71        | 0.90        | 1.04        |
| Citrulline        | HMDB00904                                              | 30+-9           | 32+-7            | 0.57        | 0.84        | 0.95        |
| Creatinine        | HMDB0000562                                            | 72+-16          | 82+-14           | 0.04        | 0.50        | 0.88        |
| Glutamine         | HMDB00641<br>HMDB03423                                 | 740+-80         | 740+-110         | 0.88        | 0.96        | 1.01        |
| Glutamic acid     | HMDB00148<br>HMDB03339                                 | 47+-23          | 33+-20           | 0.04        | 0.50        | 1.42        |
| Glycine           | HMDB00123                                              | 270+-60         | 310+-80          | 0.06        | 0.59        | 0.87        |
| H1                |                                                        | 3800+-<br>1300  | 3700+-600        | 0.79        | 0.95        | 1.02        |
| Histidine         | <b>HMDB00177</b>                                       | <b>78+-10</b>   | <b>87+-7</b>     | <b>0.00</b> | <b>0.03</b> | <b>0.89</b> |
| Isoleucine        | HMDB00172<br>HMDB0000557                               | 71+-14          | 73+-13           | 0.59        | 0.84        | 0.97        |
| Kynurenine        | HMDB00684                                              | 4.5+-0.7        | 4.8+-0.9         | 0.16        | 0.73        | 0.93        |
| Leucine           | HMDB00687<br>HMDB0013773                               | 100+-30         | 110+-30          | 0.31        | 0.81        | 0.92        |
| Lysine            | HMDB00182<br>HMDB03405                                 | 360+-30         | 320+-50          | 0.01        | 0.16        | 1.13        |
| lysoPC a<br>C16:0 | HMDB10382<br>HMDB0061702                               | 83+-13          | 83+-17           | 0.95        | 0.98        | 1.00        |
| lysoPC a<br>C16:1 | HMDB0010383                                            | 3+-1.1          | 3.2+-0.8         | 0.53        | 0.84        | 0.94        |
| lysoPC a<br>C17:0 | HMDB12108                                              | 7+-1            | 7.4+-1.6         | 0.27        | 0.77        | 0.94        |
| lysoPC a<br>C18:0 | HMDB10384<br>HMDB0011128                               | 28+-6           | 28+-5            | 0.88        | 0.96        | 1.01        |
| lysoPC a<br>C18:1 | HMDB02815<br>HMDB0010385<br>HMDB0061701                | 23+-6           | 26+-8            | 0.21        | 0.75        | 0.90        |
| lysoPC a<br>C18:2 | HMDB10386<br>HMDB0061700                               | 33+-9           | 37+-15           | 0.29        | 0.81        | 0.89        |
| lysoPC a<br>C20:3 | HMDB10394<br>HMDB0010393                               | 3+-0.9          | 3+-0.8           | 0.98        | 0.98        | 1.00        |

|                   |                                                                       |            |            |      |      |      |
|-------------------|-----------------------------------------------------------------------|------------|------------|------|------|------|
| lysoPC a<br>C20:4 | HMDB10395<br>HMDB0010396                                              | 8.3+-2     | 8+-3       | 0.50 | 0.84 | 1.06 |
| lysoPC a<br>C28:0 | HMDB29206                                                             | 0.5+-0.3   | 0.6+-0.3   | 0.13 | 0.73 | 0.77 |
| lysoPC a<br>C28:1 | HMDB0029221                                                           | 0.6+-0.4   | 0.8+-0.4   | 0.04 | 0.50 | 0.68 |
| Methionine        | HMDB00696                                                             | 29+-4      | 30+-4      | 0.49 | 0.84 | 0.97 |
| Ornithine         | HMDB00214<br>HMDB03374                                                | 41+-16     | 46+-23     | 0.37 | 0.83 | 0.88 |
| PC aa C28:1       | HMDB0007867<br>HMDB0007899                                            | 3+-0.8     | 3.3+-0.7   | 0.15 | 0.73 | 0.90 |
| PC aa C30:0       | HMDB0007934<br>HMDB0007869<br>HMDB0007965                             | 12+-3      | 12.1+-2.2  | 0.82 | 0.96 | 1.02 |
| PC aa C30:2       | HMDB0007999                                                           | 1.2+-0.23  | 1.1+-0.3   | 0.20 | 0.75 | 1.09 |
| PC aa C32:0       | HMDB00564<br>HMDB0007871<br>HMDB0008031                               | 14+-4      | 14+-3      | 0.44 | 0.83 | 1.06 |
| PC aa C32:1       | HMDB0007872<br>HMDB0007873<br>HMDB0008097<br>HMDB0007969              | 17+-11     | 17+-7      | 0.98 | 0.98 | 1.00 |
| PC aa C32:2       | HMDB0008002<br>HMDB0007874                                            | 4.6+-1.9   | 5+-1.7     | 0.50 | 0.84 | 0.93 |
| PC aa C32:3       | HMDB0007876                                                           | 0.69+-0.16 | 0.74+-0.13 | 0.27 | 0.77 | 0.93 |
| PC aa C34:1       | HMDB0007971<br>HMDB08100<br>HMDB0008035<br>HMDB0007972<br>HMDB0008003 | 240+-60    | 250+-50    | 0.67 | 0.89 | 0.97 |
| PC aa C34:2       | HMDB07973<br>HMDB0008101<br>HMDB0008133<br>HMDB0008005<br>HMDB0008004 | 390+-50    | 390+-70    | 0.97 | 0.98 | 1.00 |
| PC aa C34:3       | HMDB08006<br>HMDB0007974<br>HMDB0007975                               | 14+-4      | 16+-6      | 0.20 | 0.75 | 0.87 |
| PC aa C34:4       | HMDB0007883<br>HMDB0007976                                            | 1.9+-0.9   | 2+-0.7     | 0.83 | 0.96 | 0.97 |
| PC aa C36:0       | HMDB0008265<br>HMDB0008036<br>HMDB0008525<br>HMDB0007886              | 5.9+-1.3   | 6+-1.1     | 0.67 | 0.89 | 0.97 |
| PC aa C36:1       | HMDB08038<br>HMDB0008069<br>HMDB0007978<br>HMDB0008102                | 62+-14     | 65+-13     | 0.42 | 0.83 | 0.95 |
| PC aa C36:2       | HMDB08039<br>HMDB0008070<br>HMDB08135<br>HMDB0007979                  | 230+-40    | 230+-40    | 0.87 | 0.96 | 1.01 |



|             |                                                                                                                                                  |            |            |      |      |      |
|-------------|--------------------------------------------------------------------------------------------------------------------------------------------------|------------|------------|------|------|------|
| PC aa C36:3 | HMDB08105<br>HMDB0007980<br>HMDB0007981<br>HMDB0008040                                                                                           | 130+-30    | 140+-30    | 0.78 | 0.95 | 0.98 |
| PC aa C36:4 | HMDB07982<br>HMDB0008107<br>HMDB0008138<br>HMDB0008234<br>HMDB0008429<br>HMDB0008170<br>HMDB0008138<br>HMDB0008042<br>HMDB0008203<br>HMDB0008106 | 170+-40    | 160+-30    | 0.13 | 0.73 | 1.11 |
| PC aa C36:5 | HMDB07984<br>HMDB0008015                                                                                                                         | 20+-14     | 21+-12     | 0.79 | 0.95 | 0.95 |
| PC aa C36:6 | HMDB0008206<br>HMDB0007892                                                                                                                       | 0.9+-0.4   | 0.9+-0.4   | 0.52 | 0.84 | 0.92 |
| PC aa C38:0 | HMDB0007893<br>HMDB0008528<br>HMDB0008043<br>HMDB0008755<br>HMDB0008267<br>HMDB0007985                                                           | 3.4+-0.6   | 3.2+-0.7   | 0.53 | 0.84 | 1.04 |
| PC aa C38:1 | HMDB0007894<br>HMDB0008269<br>HMDB0007986<br>HMDB0008268<br>HMDB0008109<br>HMDB0008044                                                           | 0.14+-0.18 | 0.22+-0.24 | 0.22 | 0.75 | 0.64 |
| PC aa C38:3 | HMDB0008020<br>HMDB0008046<br>HMDB0008047                                                                                                        | 50+-12     | 47+-11     | 0.42 | 0.83 | 1.06 |
| PC aa C38:4 | HMDB0008048<br>HMDB0008112<br>HMDB0008113<br>HMDB0007988                                                                                         | 101+-24    | 85+-17     | 0.02 | 0.46 | 1.18 |
| PC aa C38:5 | HMDB0007990<br>HMDB0007989<br>HMDB0008050<br>HMDB0008114                                                                                         | 51+-11     | 49+-11     | 0.58 | 0.84 | 1.04 |
| PC aa C38:6 | HMDB0008725<br>HMDB0008116<br>HMDB0008434<br>HMDB0007991<br>HMDB0008147<br>HMDB0008083<br>HMDB0008499                                            | 60+-16     | 59+-17     | 0.81 | 0.96 | 1.02 |
| PC aa C40:2 | HMDB0008308<br>HMDB0008276                                                                                                                       | 0.45+-0.08 | 0.42+-0.11 | 0.44 | 0.83 | 1.06 |
| PC aa C40:3 | HMDB0008278<br>HMDB0008277<br>HMDB0008086<br>HMDB0008119                                                                                         | 0.77+-0.14 | 0.77+-0.13 | 0.92 | 0.98 | 1.01 |

|             |                                                                                                                                                                                                 |            |            |      |      |      |
|-------------|-------------------------------------------------------------------------------------------------------------------------------------------------------------------------------------------------|------------|------------|------|------|------|
| PC aa C40:4 | HMDB0008279<br>HMDB0008628<br>HMDB0008054                                                                                                                                                       | 4+-1       | 3.6+-0.8   | 0.15 | 0.73 | 1.11 |
| PC aa C40:5 | HMDB0008056<br>HMDB0008055<br>HMDB0008120                                                                                                                                                       | 9.8+-2.2   | 8.8+-2     | 0.13 | 0.73 | 1.11 |
| PC aa C40:6 | HMDB08057<br>HMDB0008089                                                                                                                                                                        | 20+-5      | 18+-4      | 0.23 | 0.75 | 1.10 |
| PC aa C42:0 | HMDB0008537<br>HMDB0008760<br>HMDB0008282<br>HMDB0008058                                                                                                                                        | 0.46+-0.1  | 0.48+-0.09 | 0.48 | 0.84 | 0.96 |
| PC aa C42:1 | HMDB0008762<br>HMDB0008124<br>HMDB0008283<br>HMDB0008538<br>HMDB0008059                                                                                                                         | 0.26+-0.09 | 0.28+-0.08 | 0.44 | 0.83 | 0.93 |
| PC aa C42:2 | HMDB0008157<br>HMDB0008795<br>HMDB0008125<br>HMDB0008763<br>HMDB0008092<br>HMDB0008316<br>HMDB0008794<br>HMDB0008602<br>HMDB0008284<br>HMDB0008348<br>HMDB0008539<br>HMDB0011330<br>HMDB0008570 | 0.25+-0.06 | 0.24+-0.07 | 0.58 | 0.84 | 1.05 |
| PC aa C42:4 | HMDB0008191                                                                                                                                                                                     | 0.26+-0.09 | 0.23+-0.08 | 0.21 | 0.75 | 1.15 |
| PC aa C42:5 | HMDB08287                                                                                                                                                                                       | 0.33+-0.09 | 0.36+-0.11 | 0.43 | 0.83 | 0.93 |
| PC aa C42:6 | HMDB0008288                                                                                                                                                                                     | 0.42+-0.09 | 0.41+-0.14 | 0.67 | 0.89 | 1.04 |
| PC ae C30:0 | HMDB0013341                                                                                                                                                                                     | 0.55+-0.21 | 0.61+-0.12 | 0.16 | 0.73 | 0.90 |
| PC ae C30:1 | HMDB0013402                                                                                                                                                                                     | 0.72+-0.16 | 0.79+-0.11 | 0.11 | 0.73 | 0.91 |
| PC ae C32:1 | HMDB0013404<br>HMDB0007896<br>HMDB0007994                                                                                                                                                       | 2.6+-0.6   | 2.7+-0.5   | 0.33 | 0.81 | 0.94 |
| PC ae C32:2 | HMDB0013411                                                                                                                                                                                     | 1.2+-0.3   | 1.29+-0.24 | 0.49 | 0.84 | 0.95 |
| PC ae C34:0 | HMDB0013405                                                                                                                                                                                     | 1.9+-0.6   | 2.1+-0.5   | 0.40 | 0.83 | 0.93 |
| PC ae C34:1 | HMDB0013426                                                                                                                                                                                     | 9.3+-2.4   | 10.2+-1.9  | 0.17 | 0.73 | 0.91 |
| PC ae C34:2 | HMDB0011151                                                                                                                                                                                     | 11+-3      | 11.2+-2.3  | 0.33 | 0.81 | 0.94 |
| PC ae C34:3 | HMDB0013413                                                                                                                                                                                     | 8+-1.9     | 8.5+-2     | 0.45 | 0.84 | 0.95 |
| PC ae C36:0 | HMDB13406<br>HMDB0013417                                                                                                                                                                        | 1.2+-0.3   | 1.4+-0.3   | 0.23 | 0.75 | 0.93 |
| PC ae C36:1 | HMDB0013427<br>HMDB0013414                                                                                                                                                                      | 7.7+-1.8   | 8.7+-1.7   | 0.06 | 0.63 | 0.88 |
| PC ae C36:2 | HMDB0013418<br>HMDB0013428<br>HMDB0011243                                                                                                                                                       | 13+-3      | 14+-3      | 0.39 | 0.83 | 0.95 |
| PC ae C36:3 | HMDB0013429<br>HMDB0013425                                                                                                                                                                      | 7.9+-1.9   | 8.1+-1.6   | 0.78 | 0.95 | 0.98 |
| PC ae C36:4 | HMDB0013435<br>HMDB0013407                                                                                                                                                                      | 15+-4      | 13+-4      | 0.27 | 0.77 | 1.11 |

|                  |                                           |                  |                   |             |             |             |
|------------------|-------------------------------------------|------------------|-------------------|-------------|-------------|-------------|
| PC ae C36:5      | HMDB0013415<br>HMDB0011220                | 30+-7            | 30+-5             | 0.84        | 0.96        | 1.01        |
| PC ae C38:0      | HMDB0013408<br>HMDB0013419                | 1.9+-0.6         | 2.1+-0.6          | 0.21        | 0.75        | 0.90        |
| PC ae C38:1      | HMDB0013419<br>HMDB0013408                | 1.4+-0.3         | 1.6+-0.3          | 0.03        | 0.50        | 0.88        |
| PC ae C38:2      | HMDB0013416<br>HMDB0013430                | 2.3+-0.5         | 2.6+-0.5          | 0.12        | 0.73        | 0.91        |
| PC ae C38:3      | HMDB0013436<br>HMDB0013431                | 4+-0.9           | 4.3+-0.7          | 0.33        | 0.81        | 0.94        |
| PC ae C38:4      | HMDB0013420                               | 13+-3            | 12.1+-2.1         | 0.56        | 0.84        | 1.04        |
| PC ae C38:5      | HMDB11253<br>HMDB0013432                  | 16+-3            | 14+-3             | 0.10        | 0.73        | 1.11        |
| PC ae C38:6      | HMDB0013409                               | 6.3+-1.4         | 6+-1.8            | 0.57        | 0.84        | 1.05        |
| PC ae C40:1      | HMDB0013433                               | 1.09+-0.22       | 1.2+-0.3          | 0.17        | 0.73        | 0.91        |
| PC ae C40:2      | HMDB0013437                               | 1.4+-0.3         | 1.6+-0.3          | 0.12        | 0.73        | 0.90        |
| PC ae C40:3      | HMDB0013445<br>HMDB0013446                | 1.03+-0.17       | 1.12+-0.17        | 0.09        | 0.73        | 0.92        |
| PC ae C40:4      | HMDB0013442                               | 2.1+-0.4         | 2.1+-0.4          | 0.79        | 0.95        | 0.99        |
| PC ae C40:5      | HMDB0013444                               | 3+-0.4           | 3+-0.5            | 0.89        | 0.96        | 0.99        |
| PC ae C40:6      | HMDB0013422                               | 3.7+-0.8         | 3.7+-0.8          | 0.85        | 0.96        | 0.99        |
| PC ae C42:1      | HMDB0013434<br>HMDB0013447                | 0.33+-0.07       | 0.32+-0.06        | 0.50        | 0.84        | 1.04        |
| PC ae C42:2      | HMDB0013438                               | 0.52+-0.13       | 0.57+-0.09        | 0.19        | 0.75        | 0.92        |
| PC ae C42:3      | <b>HMDB0013458</b><br><b>HMDB0013459</b>  | <b>0.69+-0.1</b> | <b>0.82+-0.12</b> | <b>0.00</b> | <b>0.02</b> | <b>0.84</b> |
| PC ae C44:3      | HMDB0013449<br>HMDB0013452                | 0.15+-0.06       | 0.15+-0.06        | 0.97        | 0.98        | 1.00        |
| PC ae C44:4      | HMDB0013455<br>HMDB0013453<br>HMDB0013460 | 0.46+-0.1        | 0.47+-0.09        | 0.66        | 0.89        | 0.97        |
| PC ae C44:5      | HMDB0013456                               | 1.6+-0.4         | 1.7+-0.4          | 0.35        | 0.82        | 0.93        |
| PC ae C44:6      | HMDB0013450<br>HMDB0013457                | 0.99+-0.18       | 0.99+-0.24        | 0.95        | 0.98        | 1.00        |
| Phenylalanine    | HMDB00159                                 | 66+-8            | 70+-23            | 0.43        | 0.83        | 0.94        |
| Proline          | HMDB00162<br>HMDB03411                    | 230+-50          | 200+-40           | 0.03        | 0.50        | 1.17        |
| Putrescine       | HMDB01414                                 | 0.17+-0.07       | 0.19+-0.06        | 0.32        | 0.81        | 0.89        |
| Serine           | HMDB00187<br>HMDB03406                    | 118+-22          | 119+-18           | 0.87        | 0.96        | 0.99        |
| Serotonin        | HMDB00259                                 | 0.8+-0.4         | 0.8+-0.3          | 0.68        | 0.89        | 0.94        |
| SM (OH)<br>C14:1 | HMDB0013462                               | 5.9+-2.1         | 6.6+-1.6          | 0.25        | 0.76        | 0.90        |
| SM (OH)<br>C16:1 | HMDB0013463                               | 4.2+-1.2         | 4.3+-0.9          | 0.68        | 0.89        | 0.97        |
| SM (OH)<br>C22:1 | HMDB0013466                               | 17+-4            | 19+-4             | 0.31        | 0.81        | 0.93        |
| SM (OH)<br>C22:2 | HMDB0013467                               | 14+-3            | 16+-3             | 0.17        | 0.73        | 0.92        |
| SM (OH)<br>C24:1 | HMDB0013469                               | 1.8+-0.4         | 1.9+-0.5          | 0.70        | 0.90        | 0.97        |
| SM C16:0         | HMDB0061712<br>HMDB0010169                | 146+-23          | 140+-20           | 0.41        | 0.83        | 1.04        |
| SM C16:1         | HMDB0029216                               | 21+-4            | 20+-3             | 0.34        | 0.82        | 1.05        |
| SM C18:0         | HMDB01348                                 | 28+-7            | 28+-6             | 0.92        | 0.98        | 1.01        |

|                |                            |                   |                  |             |             |             |
|----------------|----------------------------|-------------------|------------------|-------------|-------------|-------------|
| SM C18:1       | HMDB0012100<br>HMDB0012101 | 14+-3             | 13+-3            | 0.64        | 0.89        | 1.04        |
| SM C20:2       |                            | 0.49+-0.19        | 0.51+-0.16       | 0.73        | 0.92        | 0.96        |
| SM C22:3       |                            | 2.7+-1.2          | 2.6+-1.2         | 0.95        | 0.98        | 1.01        |
| SM C24:0       | HMDB11697                  | 37+-6             | 36+-7            | 0.52        | 0.84        | 1.03        |
| SM C24:1       | HMDB12107                  | 69+-12            | 65+-12           | 0.27        | 0.77        | 1.06        |
| SM C26:0       | HMDB0011698                | 0.39+-0.16        | 0.42+-0.15       | 0.49        | 0.84        | 0.92        |
| SM C26:1       | HMDB0013461                | 0.44+-0.22        | 0.41+-0.16       | 0.58        | 0.84        | 1.08        |
| <b>Taurine</b> | <b>HMDB00251</b>           | <b>61+-11</b>     | <b>84+-21</b>    | <b>0.00</b> | <b>0.01</b> | <b>0.72</b> |
| Threonine      | HMDB04041<br>HMDB00167     | 121+-25           | 120+-30          | 0.60        | 0.84        | 0.97        |
| Tryptophane    | HMDB00929<br>HMDB0013609   | 65+-13            | 69+-10           | 0.24        | 0.75        | 0.94        |
| Tyrosine       | HMDB00158                  | 71+-16            | 67+-12           | 0.40        | 0.83        | 1.05        |
| Valine         | HMDB00883                  | 240+-48           | 270+-40          | 0.05        | 0.59        | 0.90        |
| BCAA           |                            | 416+-90           | 455+-81          |             |             |             |
| AAA            |                            | 279+-30           | 294+-34          |             |             |             |
| Fischer ratio  |                            | 1.49+-0.25        | 1.56+-0.26       |             |             |             |
| ADMA/Arg       |                            | 0.0046+-<br>0.001 | 0.004+-<br>0.001 |             |             |             |
| Cit/Arg        |                            | 0.26+-0.08        | 0.27+-0.05       |             |             |             |
| Cit/Orn        |                            | 0.85+-0.38        | 1.34+-2.3        |             |             |             |
| Orn/Arg        |                            | 0.35+-0.13        | 0.39+-0.21       |             |             |             |

**Table S1 c.** Values of amino acids, of biogenic amines and their derivatives, and of selected sums and ratios – patients with preserved systolic function and without major valve regurgitation (group AFV).

| Metabolite        | HMDB ID                                                | Patients         | Controls     | p           | q           | FC          |
|-------------------|--------------------------------------------------------|------------------|--------------|-------------|-------------|-------------|
| ADMA              | HMDB01539                                              | 0.53+-0.12       | 0.48+-0.1    | 0.28        | 0.84        | 1.10        |
| Alanine           | HMDB00161<br>HMDB01310                                 | 430+-70          | 380+-80      | 0.14        | 0.84        | 1.11        |
| Arginine          | HMDB00517<br>HMDB03416                                 | 123+-13          | 121+-20      | 0.71        | 0.92        | 1.02        |
| Asparagine        | HMDB00168<br>HMDB003378                                | 50+-12           | 51+-7        | 0.69        | 0.92        | 0.97        |
| Aspartic acid     | HMDB00191<br>HMDB06483                                 | 18.9+-2.4        | 20+-4        | 0.43        | 0.85        | 0.95        |
| C0                | HMDB00062                                              | 36+-9            | 33+-4        | 0.31        | 0.84        | 1.08        |
| C14:1             | HMDB0002014                                            | 0.13+-0.04       | 0.14+-0.03   | 0.47        | 0.85        | 0.93        |
| C18:1             | HMDB0006351<br>HMDB0005065<br>HMDB06464<br>HMDB0013338 | 0.14+-0.05       | 0.15+-0.04   | 0.65        | 0.92        | 0.95        |
| C18:2             | HMDB0006469<br>HMDB0006461                             | 0.049+-<br>0.022 | 0.052+-0.02  | 0.79        | 0.92        | 0.96        |
| C2                | HMDB00201                                              | 6+-3             | 6.6+-1.6     | 0.57        | 0.91        | 0.93        |
| Citrulline        | HMDB00904                                              | 31+-9            | 33+-7        | 0.57        | 0.91        | 0.94        |
| Creatinine        | HMDB0000562                                            | 76+-19           | 83+-17       | 0.27        | 0.84        | 0.91        |
| Glutamine         | HMDB00641<br>HMDB03423                                 | 750+-80          | 730+-110     | 0.58        | 0.91        | 1.03        |
| Glutamic acid     | HMDB00148<br>HMDB03339                                 | 45+-23           | 35+-24       | 0.24        | 0.84        | 1.30        |
| Glycine           | HMDB00123                                              | 270+-50          | 290+-50      | 0.19        | 0.84        | 0.91        |
| H1                |                                                        | 3900+-1600       | 3700+-400    | 0.61        | 0.92        | 1.06        |
| <b>Histidine</b>  | <b>HMDB00177</b>                                       | <b>81+-10</b>    | <b>87+-9</b> | <b>0.07</b> | <b>0.84</b> | <b>0.92</b> |
| Isoleucine        | HMDB00172<br>HMDB0000557                               | 76+-15           | 74+-12       | 0.66        | 0.92        | 1.03        |
| Kynurenine        | HMDB00684                                              | 4.4+-0.8         | 4.6+-0.8     | 0.45        | 0.85        | 0.95        |
| Leucine           | HMDB00687<br>HMDB0013773                               | 120+-30          | 110+-30      | 0.95        | 0.98        | 1.01        |
| Lysine            | HMDB00182<br>HMDB03405                                 | 370+-40          | 320+-60      | 0.01        | 0.29        | 1.16        |
| lysoPC a<br>C16:0 | HMDB10382<br>HMDB0061702                               | 85+-14           | 80+-11       | 0.35        | 0.84        | 1.06        |
| lysoPC a<br>C16:1 | HMDB0010383                                            | 3.2+-1           | 3+-0.5       | 0.61        | 0.92        | 1.05        |
| lysoPC a<br>C17:0 | HMDB12108                                              | 7.1+-1           | 7.3+-1.1     | 0.66        | 0.92        | 0.98        |
| lysoPC a<br>C18:0 | HMDB10384<br>HMDB0011128                               | 28+-6            | 28+-4        | 0.83        | 0.92        | 1.02        |
| lysoPC a<br>C18:1 | HMDB02815<br>HMDB0010385<br>HMDB0061701                | 24+-6            | 26+-6        | 0.41        | 0.84        | 0.93        |
| lysoPC a<br>C18:2 | HMDB10386<br>HMDB0061700                               | 35+-10           | 38+-15       | 0.56        | 0.91        | 0.92        |
| lysoPC a<br>C20:3 | HMDB10394<br>HMDB0010393                               | 3.1+-1           | 3+-0.9       | 0.81        | 0.92        | 1.03        |

|                   |                                                                       |            |            |      |      |      |
|-------------------|-----------------------------------------------------------------------|------------|------------|------|------|------|
| lysoPC a<br>C20:4 | HMDB10395<br>HMDB0010396                                              | 9+-2       | 8+-3       | 0.38 | 0.84 | 1.10 |
| lysoPC a<br>C28:0 | HMDB29206                                                             | 0.5+-0.3   | 0.6+-0.3   | 0.33 | 0.84 | 0.80 |
| lysoPC a<br>C28:1 | HMDB0029221                                                           | 0.6+-0.4   | 0.7+-0.5   | 0.40 | 0.84 | 0.82 |
| Methionine        | HMDB00696                                                             | 30+-4      | 31+-4      | 0.58 | 0.91 | 0.97 |
| Ornithine         | HMDB00214<br>HMDB03374                                                | 42+-16     | 51+-25     | 0.23 | 0.84 | 0.81 |
| PC aa C28:1       | HMDB0007867<br>HMDB0007899                                            | 3+-0.8     | 3.1+-0.6   | 0.67 | 0.92 | 0.96 |
| PC aa C30:0       | HMDB0007934<br>HMDB0007869<br>HMDB0007965                             | 12+-3      | 11.3+-1.6  | 0.36 | 0.84 | 1.08 |
| PC aa C30:2       | HMDB0007999                                                           | 1.21+-0.24 | 1+-0.3     | 0.08 | 0.84 | 1.17 |
| PC aa C32:0       | HMDB00564<br>HMDB0007871<br>HMDB0008031                               | 14+-4      | 12.8+-2.4  | 0.20 | 0.84 | 1.14 |
| PC aa C32:1       | HMDB0007872<br>HMDB0007873<br>HMDB0008097<br>HMDB0007969              | 17+-12     | 14+-6      | 0.41 | 0.84 | 1.21 |
| PC aa C32:2       | HMDB0008002<br>HMDB0007874                                            | 4.8+-2.1   | 4.3+-1.6   | 0.51 | 0.89 | 1.11 |
| PC aa C32:3       | HMDB0007876                                                           | 0.69+-0.18 | 0.71+-0.13 | 0.74 | 0.92 | 0.97 |
| PC aa C34:1       | HMDB0007971<br>HMDB08100<br>HMDB0008035<br>HMDB0007972<br>HMDB0008003 | 240+-60    | 230+-40    | 0.48 | 0.85 | 1.06 |
| PC aa C34:2       | HMDB07973<br>HMDB0008101<br>HMDB0008133<br>HMDB0008005<br>HMDB0008004 | 400+-50    | 370+-60    | 0.10 | 0.84 | 1.10 |
| PC aa C34:3       | HMDB08006<br>HMDB0007974<br>HMDB0007975                               | 14+-5      | 15+-7      | 0.74 | 0.92 | 0.95 |
| PC aa C34:4       | HMDB0007883<br>HMDB0007976                                            | 2+-1       | 1.7+-0.6   | 0.34 | 0.84 | 1.18 |
| PC aa C36:0       | HMDB0008265<br>HMDB0008036<br>HMDB0008525<br>HMDB0007886              | 5.9+-1.3   | 5.8+-1     | 0.74 | 0.92 | 1.02 |
| PC aa C36:1       | HMDB08038<br>HMDB0008069<br>HMDB0007978<br>HMDB0008102                | 63+-14     | 62+-13     | 0.93 | 0.97 | 1.01 |
| PC aa C36:2       | HMDB08039<br>HMDB0008070<br>HMDB08135<br>HMDB0007979                  | 240+-40    | 220+-40    | 0.25 | 0.84 | 1.08 |
| PC aa C36:3       | HMDB08105<br>HMDB0007980<br>HMDB0007981<br>HMDB0008040                | 140+-30    | 124+-23    | 0.20 | 0.84 | 1.10 |

|             |                                                                                                                                                  |            |           |      |      |      |
|-------------|--------------------------------------------------------------------------------------------------------------------------------------------------|------------|-----------|------|------|------|
| PC aa C36:4 | HMDB07982<br>HMDB0008107<br>HMDB0008138<br>HMDB0008234<br>HMDB0008429<br>HMDB0008170<br>HMDB0008138<br>HMDB0008042<br>HMDB0008203<br>HMDB0008106 | 190+-40    | 150+-30   | 0.01 | 0.29 | 1.24 |
| PC aa C36:5 | HMDB07984<br>HMDB0008015                                                                                                                         | 19+-11     | 18+-8     | 0.71 | 0.92 | 1.08 |
| PC aa C36:6 | HMDB0008206<br>HMDB0007892                                                                                                                       | 0.9+-0.4   | 0.8+-0.3  | 0.57 | 0.91 | 1.09 |
| PC aa C38:0 | HMDB0007893<br>HMDB0008528<br>HMDB0008043<br>HMDB0008755<br>HMDB0008267<br>HMDB0007985                                                           | 3.4+-0.7   | 3.2+-0.7  | 0.39 | 0.84 | 1.07 |
| PC aa C38:1 | HMDB0007894<br>HMDB0008269<br>HMDB0007986<br>HMDB0008268<br>HMDB0008109<br>HMDB0008044                                                           | 0.15+-0.2  | 0.2+-0.3  | 0.42 | 0.85 | 0.67 |
| PC aa C38:3 | HMDB0008020<br>HMDB0008046<br>HMDB0008047                                                                                                        | 50+-12     | 44+-10    | 0.16 | 0.84 | 1.14 |
| PC aa C38:4 | HMDB0008048<br>HMDB0008112<br>HMDB0008113<br>HMDB0007988                                                                                         | 106+-24    | 84+-17    | 0.01 | 0.29 | 1.26 |
| PC aa C38:5 | HMDB0007990<br>HMDB0007989<br>HMDB0008050<br>HMDB0008114                                                                                         | 51+-10     | 47+-10    | 0.25 | 0.84 | 1.09 |
| PC aa C38:6 | HMDB0008725<br>HMDB0008116<br>HMDB0008434<br>HMDB0007991<br>HMDB0008147<br>HMDB0008083<br>HMDB0008499                                            | 60+-15     | 55+-16    | 0.45 | 0.85 | 1.08 |
| PC aa C40:2 | HMDB0008308<br>HMDB0008276                                                                                                                       | 0.45+-0.07 | 0.4+-0.12 | 0.21 | 0.84 | 1.12 |
| PC aa C40:3 | HMDB0008278<br>HMDB0008277<br>HMDB0008086<br>HMDB0008119                                                                                         | 0.76+-0.11 | 0.73+-0.1 | 0.41 | 0.84 | 1.05 |
| PC aa C40:4 | HMDB0008279<br>HMDB0008628<br>HMDB0008054                                                                                                        | 4+-0.9     | 3.5+-0.8  | 0.12 | 0.84 | 1.15 |
| PC aa C40:5 | HMDB0008056<br>HMDB0008055<br>HMDB0008120                                                                                                        | 9.5+-1.7   | 8.6+-2    | 0.18 | 0.84 | 1.11 |
| PC aa C40:6 | HMDB08057<br>HMDB0008089                                                                                                                         | 19+-5      | 17+-4     | 0.21 | 0.84 | 1.13 |

|             |                                                                                                                                                                                                 |            |            |      |      |      |
|-------------|-------------------------------------------------------------------------------------------------------------------------------------------------------------------------------------------------|------------|------------|------|------|------|
| PC aa C42:0 | HMDB0008537<br>HMDB0008760<br>HMDB0008282<br>HMDB0008058                                                                                                                                        | 0.45+-0.09 | 0.49+-0.09 | 0.28 | 0.84 | 0.92 |
| PC aa C42:1 | HMDB0008762<br>HMDB0008124<br>HMDB0008283<br>HMDB0008538<br>HMDB0008059                                                                                                                         | 0.27+-0.08 | 0.28+-0.09 | 0.73 | 0.92 | 0.96 |
| PC aa C42:2 | HMDB0008157<br>HMDB0008795<br>HMDB0008125<br>HMDB0008763<br>HMDB0008092<br>HMDB0008316<br>HMDB0008794<br>HMDB0008602<br>HMDB0008284<br>HMDB0008348<br>HMDB0008539<br>HMDB0011330<br>HMDB0008570 | 0.24+-0.05 | 0.24+-0.05 | 0.79 | 0.92 | 0.98 |
| PC aa C42:4 | HMDB0008191                                                                                                                                                                                     | 0.26+-0.09 | 0.22+-0.07 | 0.28 | 0.84 | 1.16 |
| PC aa C42:5 | HMDB08287                                                                                                                                                                                       | 0.33+-0.11 | 0.34+-0.11 | 0.85 | 0.93 | 0.98 |
| PC aa C42:6 | HMDB0008288                                                                                                                                                                                     | 0.41+-0.09 | 0.37+-0.14 | 0.35 | 0.84 | 1.12 |
| PC ae C30:0 | HMDB0013341                                                                                                                                                                                     | 0.52+-0.24 | 0.59+-0.11 | 0.32 | 0.84 | 0.88 |
| PC ae C30:1 | HMDB0013402                                                                                                                                                                                     | 0.71+-0.18 | 0.77+-0.12 | 0.36 | 0.84 | 0.92 |
| PC ae C32:1 | HMDB0013404<br>HMDB0007896<br>HMDB0007994                                                                                                                                                       | 2.7+-0.7   | 2.7+-0.5   | 0.83 | 0.92 | 0.98 |
| PC ae C32:2 | HMDB0013411                                                                                                                                                                                     | 1.2+-0.4   | 1.23+-0.22 | 0.97 | 0.98 | 1.00 |
| PC ae C34:0 | HMDB0013405                                                                                                                                                                                     | 1.9+-0.7   | 2+-0.4     | 0.76 | 0.92 | 0.97 |
| PC ae C34:1 | HMDB0013426                                                                                                                                                                                     | 9+-3       | 9.9+-1.9   | 0.46 | 0.85 | 0.93 |
| PC ae C34:2 | HMDB0011151                                                                                                                                                                                     | 11+-3      | 11.4+-2.4  | 0.53 | 0.89 | 0.94 |
| PC ae C34:3 | HMDB0013413                                                                                                                                                                                     | 8.4+-2     | 8.5+-1.9   | 0.88 | 0.95 | 0.99 |
| PC ae C36:0 | HMDB13406<br>HMDB0013417                                                                                                                                                                        | 1.2+-0.3   | 1.3+-0.3   | 0.36 | 0.84 | 0.93 |
| PC ae C36:1 | HMDB0013427<br>HMDB0013414                                                                                                                                                                      | 7.5+-2     | 8.2+-1.4   | 0.30 | 0.84 | 0.92 |
| PC ae C36:2 | HMDB0013418<br>HMDB0013428<br>HMDB0011243                                                                                                                                                       | 13+-3      | 13+-3      | 0.77 | 0.92 | 0.97 |
| PC ae C36:3 | HMDB0013429<br>HMDB0013425                                                                                                                                                                      | 8.3+-2.1   | 8.1+-1.7   | 0.79 | 0.92 | 1.02 |
| PC ae C36:4 | HMDB0013435<br>HMDB0013407                                                                                                                                                                      | 16+-5      | 14+-5      | 0.27 | 0.84 | 1.15 |
| PC ae C36:5 | HMDB0013415<br>HMDB0011220                                                                                                                                                                      | 31+-7      | 28+-4      | 0.18 | 0.84 | 1.11 |
| PC ae C38:0 | HMDB0013408<br>HMDB0013419                                                                                                                                                                      | 1.9+-0.6   | 2+-0.4     | 0.75 | 0.92 | 0.97 |
| PC ae C38:1 | HMDB0013419<br>HMDB0013408                                                                                                                                                                      | 1.4+-0.3   | 1.5+-0.3   | 0.38 | 0.84 | 0.93 |
| PC ae C38:2 | HMDB0013416<br>HMDB0013430                                                                                                                                                                      | 2.3+-0.6   | 2.4+-0.5   | 0.66 | 0.92 | 0.96 |
| PC ae C38:3 | HMDB0013436<br>HMDB0013431                                                                                                                                                                      | 4+-1       | 4+-0.6     | 0.93 | 0.97 | 0.99 |
| PC ae C38:4 | HMDB0013420                                                                                                                                                                                     | 13+-3      | 12.2+-2.3  | 0.39 | 0.84 | 1.08 |



|                    |                                           |                   |                   |             |             |             |
|--------------------|-------------------------------------------|-------------------|-------------------|-------------|-------------|-------------|
| PC ae C38:5        | HMDB11253<br>HMDB0013432                  | 17+-4             | 15+-3             | 0.11        | 0.84        | 1.15        |
| PC ae C38:6        | HMDB0013409                               | 6.5+-1.3          | 6+-2              | 0.40        | 0.84        | 1.09        |
| PC ae C40:1        | HMDB0013433                               | 1.14+-0.24        | 1.12+-0.23        | 0.89        | 0.95        | 1.01        |
| PC ae C40:2        | HMDB0013437                               | 1.4+-0.4          | 1.5+-0.3          | 0.36        | 0.84        | 0.92        |
| PC ae C40:3        | HMDB0013445<br>HMDB0013446                | 1.02+-0.19        | 1.1+-0.17         | 0.31        | 0.84        | 0.93        |
| PC ae C40:4        | HMDB0013442                               | 2.2+-0.4          | 2.1+-0.4          | 0.68        | 0.92        | 1.03        |
| PC ae C40:5        | HMDB0013444                               | 3+-0.5            | 3+-0.5            | 0.82        | 0.92        | 1.01        |
| PC ae C40:6        | HMDB0013422                               | 3.7+-0.9          | 3.6+-0.8          | 0.93        | 0.97        | 1.01        |
| PC ae C42:1        | HMDB0013434<br>HMDB0013447                | 0.34+-0.07        | 0.31+-0.06        | 0.20        | 0.84        | 1.10        |
| PC ae C42:2        | HMDB0013438                               | 0.55+-0.15        | 0.58+-0.08        | 0.52        | 0.89        | 0.95        |
| <b>PC ae C42:3</b> | <b>HMDB0013458</b><br><b>HMDB0013459</b>  | <b>0.71+-0.11</b> | <b>0.81+-0.11</b> | <b>0.01</b> | <b>0.29</b> | <b>0.87</b> |
| PC ae C44:3        | HMDB0013449<br>HMDB0013452                | 0.16+-0.07        | 0.15+-0.08        | 0.77        | 0.92        | 1.06        |
| PC ae C44:4        | HMDB0013455<br>HMDB0013453<br>HMDB0013460 | 0.47+-0.11        | 0.47+-0.08        | 0.99        | 0.99        | 1.00        |
| PC ae C44:5        | HMDB0013456                               | 1.7+-0.4          | 1.7+-0.4          | 0.62        | 0.92        | 0.96        |
| PC ae C44:6        | HMDB0013450<br>HMDB0013457                | 1.02+-0.19        | 1.01+-0.24        | 0.89        | 0.95        | 1.01        |
| Phenylalanine      | HMDB00159                                 | 69+-7             | 68+-7             | 0.72        | 0.92        | 1.01        |
| Proline            | HMDB00162<br>HMDB03411                    | 250+-50           | 200+-40           | 0.01        | 0.29        | 1.25        |
| Putrescine         | HMDB01414                                 | 0.16+-0.06        | 0.19+-0.07        | 0.21        | 0.84        | 0.84        |
| Serine             | HMDB00187<br>HMDB03406                    | 116+-22           | 123+-21           | 0.39        | 0.84        | 0.94        |
| Serotonin          | HMDB00259                                 | 0.8+-0.3          | 0.9+-0.3          | 0.27        | 0.84        | 0.86        |
| SM (OH)<br>C14:1   | HMDB0013462                               | 5.5+-2            | 6.3+-1.5          | 0.24        | 0.84        | 0.87        |
| SM (OH)<br>C16:1   | HMDB0013463                               | 4+-1.1            | 4.2+-0.9          | 0.46        | 0.85        | 0.93        |
| SM (OH)<br>C22:1   | HMDB0013466                               | 18+-4             | 18+-4             | 0.94        | 0.97        | 0.99        |
| SM (OH)<br>C22:2   | HMDB0013467                               | 14+-3             | 15+-2.1           | 0.48        | 0.85        | 0.94        |
| SM (OH)<br>C24:1   | HMDB0013469                               | 1.8+-0.5          | 1.8+-0.5          | 0.96        | 0.98        | 1.00        |
| SM C16:0           | HMDB0061712<br>HMDB0010169                | 147+-22           | 140+-18           | 0.34        | 0.84        | 1.05        |
| SM C16:1           | HMDB0029216                               | 21+-4             | 19+-3             | 0.09        | 0.84        | 1.12        |
| SM C18:0           | HMDB01348                                 | 29+-5             | 27+-6             | 0.59        | 0.92        | 1.04        |
| SM C18:1           | HMDB0012100<br>HMDB0012101                | 13.6+-2.3         | 13+-3             | 0.41        | 0.84        | 1.07        |
| SM C20:2           |                                           | 0.5+-0.19         | 0.48+-0.15        | 0.70        | 0.92        | 1.05        |
| SM C22:3           |                                           | 2.6+-0.7          | 2.4+-0.8          | 0.48        | 0.85        | 1.09        |
| SM C24:0           | HMDB11697                                 | 38+-7             | 35+-6             | 0.18        | 0.84        | 1.10        |
| SM C24:1           | HMDB12107                                 | 70+-9             | 65+-11            | 0.14        | 0.84        | 1.09        |
| SM C26:0           | HMDB0011698                               | 0.42+-0.19        | 0.43+-0.16        | 0.80        | 0.92        | 0.96        |
| SM C26:1           | HMDB0013461                               | 0.45+-0.19        | 0.44+-0.15        | 0.87        | 0.95        | 1.03        |
| <b>Taurine</b>     | <b>HMDB00251</b>                          | <b>61+-12</b>     | <b>88+-20</b>     | <b>0.00</b> | <b>0.03</b> | <b>0.69</b> |
| Threonine          | HMDB04041<br>HMDB00167                    | 125+-24           | 130+-30           | 0.69        | 0.92        | 0.97        |

|               |                          |                   |                   |      |      |      |
|---------------|--------------------------|-------------------|-------------------|------|------|------|
| Tryptophane   | HMDB00929<br>HMDB0013609 | 66+-10            | 73+-10            | 0.08 | 0.84 | 0.91 |
| Tyrosine      | HMDB00158                | 76+-16            | 70+-11            | 0.30 | 0.84 | 1.08 |
| Valine        | HMDB00883                | 260+-50           | 270+-50           | 0.70 | 0.92 | 0.97 |
| BCAA          |                          | 450+-92           | 454+-72           |      |      |      |
| AAA           |                          | 291+-23           | 298+-25           |      |      |      |
| Fischer ratio |                          | 1.55+-0.28        | 1.52+-0.22        |      |      |      |
| ADMA/Arg      |                          | 0.0043+-<br>0.001 | 0.0041+-<br>0.001 |      |      |      |
| Cit/Arg       |                          | 0.25+-0.07        | 0.27+-0.05        |      |      |      |
| Cit/Orn       |                          | 0.82+-0.37        | 0.88+-0.7         |      |      |      |
| Orn/Arg       |                          | 0.33+-0.11        | 0.44+-0.23        |      |      |      |

**Table S2.** Multivariate regression analysis.

**Table S2 a.** Multivariate regression analysis, clinical and imaging parameters as outcome variables. Correlation of variables which were different between patients and controls and the outcome variables ‘group assignment to patients vs. controls’, ‘evidence of diastolic dysfunction’, ‘history of aortic root surgery’ and aortic root dimensions. False discovery rate-adjusted  $p (=q) \leq 0.05$  was considered statistically significant. Group A, all patients; group AF, patients with preserved systolic ventricular function; group AFV, patients with preserved systolic ventricular function and without major valve regurgitation.  $\beta$ , beta coefficient in multivariate regression; NT-proBNP, N-terminal prohormone of brain natriuretic peptide  $R^2$ , R squared referring to the regression analysis of the group of the variables listed straight above (corresponding line and column), respectively.

| Groups           | Independent variables | Outcome variable: patients vs. controls<br>$\beta/R^2 (q)$             |
|------------------|-----------------------|------------------------------------------------------------------------|
| A Pat. + Ctrl.   | NT-proBNP             | 0.002 (0.0055)                                                         |
|                  | PCaC42:3              | -0.07 (0.3)                                                            |
|                  | Taurine               | -0.009 (0.004)                                                         |
|                  | Histidine             | -0.02 (0.004)                                                          |
|                  | Adjusted $R^2 (q)$    | 0.53 (<0.0001)                                                         |
| AF Pat. + Ctrl.  | NT-proBNP             | 0.002 (0.016)                                                          |
|                  | PCaC42:3              | -0.06 (0.35)                                                           |
|                  | Taurine               | -0.009 (0.003)                                                         |
|                  | Histidine             | -0.02 (0.01)                                                           |
|                  | Adjusted $R^2 (q)$    | 0.51 (<0.0001)                                                         |
| AFV Pat. + Ctrl. | NT-proBNP             | 0.002 (0.05)                                                           |
|                  | PCaC42:3              | 0.05 (0.59)                                                            |
|                  | Taurine               | -0.012 (0.003)                                                         |
|                  | Histidine             | -0.007 (0.3)                                                           |
|                  | Adjusted $R^2 (q)$    | 0.52 (0.0004)                                                          |
| Groups           | Independent variables | Outcome variable: evidence of diastolic dysfunction<br>$\beta/r^2 (q)$ |
| A Pat.           | NT-proBNP             | 0.0007 (0.59)                                                          |
|                  | PCaC42:3              | -0.08 (0.65)                                                           |
|                  | Taurine               | 0.004 (0.77)                                                           |
|                  | Histidine             | 0.002 (0.89)                                                           |
|                  | Adjusted $R^2 (q)$    | -0.2 (0.97)                                                            |
| AF Pat.          | NT-proBNP             | 0.0004 (0.76)                                                          |
|                  | PCaC42:3              | -0.03 (0.88)                                                           |
|                  | Taurine               | -0.002 (0.89)                                                          |
|                  | Histidine             | 0.0004 (0.98)                                                          |
|                  | Adjusted $R^2 (q)$    | -0.24 (0.99)                                                           |
| AFV Pat.         | NT-proBNP             | -0.0018 (0.27)                                                         |
|                  | PCaC42:3              | 0.21 (0.39)                                                            |
|                  | Taurine               | 0.018 (0.36)                                                           |
|                  | Histidine             | 0.02 (0.33)                                                            |
|                  | Adjusted $R^2 (q)$    | -1.5 (0.67)                                                            |
| Groups           | Independent variables | Outcome variable: history of aortic root surgery<br>$\beta/r^2 (q)$    |
| A Pat.           | NT-proBNP             | 0.0002 (0.15)                                                          |
|                  | PCaC42:3              | 0.03 (0.85)                                                            |
|                  | Taurine               | -0.005 (0.77)                                                          |
|                  | Histidine             | 0.008 (0.89)                                                           |
|                  | Adjusted $R^2 (q)$    | -0.03 (0.52)                                                           |
| AF Pat.          | NT-proBNP             | 0.001 (0.19)                                                           |
|                  | PCaC42:3              | 0.09 (0.57)                                                            |
|                  | Taurine               | -0.01 (0.34)                                                           |
|                  | Histidine             | 0.01 (0.40)                                                            |
|                  | Adjusted $R^2 (q)$    | -0.005 (0.49)                                                          |
| AFV Pat.         | NT-proBNP             | 0.002 (0.18)                                                           |
|                  | PCaC42:3              | 0.12 (0.52)                                                            |
|                  | Taurine               | -0.006 (0.69)                                                          |
|                  | Histidine             | 0.008 (0.61)                                                           |
|                  | Adjusted $R^2 (q)$    | -0.02 (0.47)                                                           |
| Groups           | Independent variables | Outcome variable: aortic root dimension<br>$\beta/r^2 (q)$             |
| A Pat.           | NT-proBNP             | 0.008 (0.23)                                                           |
|                  | PCaC42:3              | -0.69 (0.34)                                                           |
|                  | Taurine               | 0.02 (0.7)                                                             |
|                  | Histidine             | -0.07 (0.37)                                                           |
|                  | Adjusted $R^2 (q)$    | -0.08 (0.56)                                                           |
| AF Pat.          | NT-proBNP             | 0.01 (0.16)                                                            |
|                  | PCaC42:3              | -0.2 (0.8)                                                             |

|               |                              |                                                                            |
|---------------|------------------------------|----------------------------------------------------------------------------|
|               | Taurine                      | -0.005 (0.9)                                                               |
|               | Histidine                    | - 0.02 (0.87)                                                              |
|               | Adjusted R <sup>2</sup> (q)  | -0.08 (0.57)                                                               |
| AFV Pat.      | NT-proBNP                    | -0.003 (0.93)                                                              |
|               | PCaC42:3                     | -0.58 (0.7)                                                                |
|               | Taurine                      | -0.02 (0.85)                                                               |
|               | Histidine                    | -0.0007 (0.99)                                                             |
|               | Adjusted R <sup>2</sup> (q)  | -1.15 (0.85)                                                               |
| <b>Groups</b> | <b>Independent variables</b> | <b>Outcome variable: ascending aorta dimension<br/>β/r<sup>2</sup> (q)</b> |
| A Pat.        | NT-proBNP                    | 0.01 (0.008)                                                               |
|               | PCaC42:3                     | 0.1 (0.85)                                                                 |
|               | Taurine                      | -0.004 (0.93)                                                              |
|               | Histidine                    | -0.05 (0.36)                                                               |
|               | Adjusted R <sup>2</sup> (q)  | -0.42 (0.048)                                                              |
| AF Pat.       | NT-proBNP                    | 0.01 (0.003)                                                               |
|               | PCaC42:3                     | -0.72 (0.17)                                                               |
|               | Taurine                      | -0.04 (0.29)                                                               |
|               | Histidine                    | 0.002 (0.97)                                                               |
|               | Adjusted R <sup>2</sup> (q)  | 0.6 (0.01)                                                                 |
| AFV Pat.      | NT-proBNP                    | 0.008 (0.11)                                                               |
|               | PCaC42:3                     | 0.73 (0.37)                                                                |
|               | Taurine                      | -0.04 (0.51)                                                               |
|               | Histidine                    | 0.02 (0.78)                                                                |
|               | Adjusted R <sup>2</sup> (q)  | 0.45 (0.19)                                                                |

**Table S2 b.** Multivariate regression analysis, biochemical parameters as outcome variables. Correlation of the variables ‘diastolic dysfunction’, ‘history of surgery’, and aortic root dimensions and the outcome variables ‘serum concentration of Histidine’, ‘serum concentration of Taurine’, ‘serum concentration of PCaC42:3’ and ‘serum concentration of NT-proBNP’. False discovery rate-adjusted  $p (=q) \leq 0.05$  was considered statistically significant. Group A, all patients; group AF, patients with preserved systolic ventricular function; group AFV, patients with preserved systolic ventricular function and without major valve regurgitation. Asc., ascending;  $\beta$ , beta coefficient in multivariate regression; dim., dimension; hx, history; NT-proBNP, N-terminal prohormone of brain natriuretic peptide  $R^2$ , R squared referring to the regression analysis of the group of the variables listed straight above (corresponding line and column), respectively; z-sc., z-score.

| Group    | Independent variables   | Outcome variable: Histidine<br>$\beta/R^2$ (q) |
|----------|-------------------------|------------------------------------------------|
| A Pat.   | Diastolic dysfunction   | -1.7 (0.76)                                    |
|          | Hx of surgery           | -2.8 (0.72)                                    |
|          | Aortic root dim. z-sc.  | -1.4 (0.61)                                    |
|          | Asc. aorta dim. z-sc.   | -0.3 (0.89)                                    |
|          | Adjusted $R^2$ (q)      | 0.13 (0.88)                                    |
| AF Pat.  | Diastolic dysfunction   | -1.3 (0.83)                                    |
|          | Hx of surgery           | -4.7 (0.59)                                    |
|          | Aortic root dim. z-sc.  | -1.4 (0.61)                                    |
|          | Asc. aorta dim. z-sc.   | 0.1 (0.96)                                     |
|          | Adjusted $R^2$ (q)      | -0.48 (0.93)                                   |
| AFV Pat. | Diastolic dysfunction   | -0.96 (0.95)                                   |
|          | Hx of surgery           | -23.7 (0.5)                                    |
|          | Aortic root dim. z-sc.  | -0.01 (0.99)                                   |
|          | Asc. aorta dim. z-sc.   | 6.3 (0.62)                                     |
|          | Adjusted $R^2$ (q)      | -1.5 (0.88)                                    |
| Groups   | Independent variables   | Outcome variable: Taurine<br>$\beta/r^2$ (q)   |
| A Pat.   | Diastolic dysfunction   | -14.6 (0.004)                                  |
|          | Hx of surgery           | -34.4 (0.0002)                                 |
|          | Aortic root diam. z-sc. | -8.6 (0.0017)                                  |
|          | Asc. aorta dim. z-sc.   | 5.33 (0.0064)                                  |
|          | Adjusted $R^2$ (q)      | 0.83 (0.002)                                   |
| AF Pat.  | Diastolic dysfunction   | -14.1 (0.005)                                  |
|          | Hx of surgery           | -36.3 (0.0003)                                 |
|          | Aortic root dim. z-sc.  | -8.1 (0.002)                                   |
|          | Asc. aorta dim. z-sc.   | 5.7 (0.005)                                    |
|          | Adjusted $R^2$ (q)      | 0.96 (0.002)                                   |
| AFV Pat. | Diastolic dysfunction   | -14.7 (0.15)                                   |
|          | Hx of surgery           | -32.4 (0.13)                                   |
|          | Aortic root dim. z-sc.  | -7.6 (0.12)                                    |
|          | Asc. aorta dim. z-sc.   | 5.7 (0.27)                                     |
|          | Adjusted $R^2$ (q)      | 0.9 (0.18)                                     |
| Groups   | Independent variables   | Outcome variable: PCaC42:3<br>$\beta/r^2$ (q)  |
| A Pat.   | Diastolic dysfunction   | -0.8 (0.28)                                    |
|          | Hx of surgery           | -1.5 (0.17)                                    |
|          | Aortic root dim. z-sc.  | -0.53 (0.15)                                   |
|          | Asc. aorta dim. z-sc.   | 0.45 (0.16)                                    |
|          | Adjusted $R^2$ (q)      | 0.03 (0.43)                                    |
| AF Pat.  | Diastolic dysfunction   | -0.7 (0.29)                                    |
|          | Hx of surgery           | -1.9 (0.08)                                    |
|          | Aortic root dim. z-sc.  | -0.55 (0.11)                                   |
|          | Asc. aorta dim. z-sc.   | 0.54 (0.08)                                    |
|          | Adjusted $R^2$ (q)      | 0.18 (0.3)                                     |
| AFV Pat. | Diastolic dysfunction   | -14.2 (0.24)                                   |
|          | Hx of surgery           | -1.7 (0.9)                                     |
|          | Aortic root dim. z-sc.  | -3.4 (0.37)                                    |
|          | Asc. aorta dim. z-sc.   | 4.7 (0.45)                                     |
|          | Adjusted $R^2$ (q)      | 0.77 (0.32)                                    |
| Groups   | Independent variables   | Outcome variable: NT-proBNP<br>$\beta/r^2$ (q) |
| A Pat.   | Diastolic dysfunction   | 14.6 (0.78)                                    |
|          | Hx of surgery           | -4.2 (0.95)                                    |
|          | Aortic root dim. z-sc.  | -3.7 (0.87)                                    |
|          | Asc. aorta dim. z-sc.   | 35.3 (0.11)                                    |
|          | Adjusted $R^2$ (q)      | 0.2 (0.26)                                     |

|                 |                             |              |
|-----------------|-----------------------------|--------------|
| <b>AF Pat.</b>  | Diastolic dysfunction       | 26 (0.4)     |
|                 | Hx of surgery               | -48 (0.3)    |
|                 | Aortic root dim. z-sc.      | -5.6 (0.7)   |
|                 | Asc. aorta dim. z-sc.       | 45.1 (0.01)  |
|                 | Adjusted R <sup>2</sup> (q) | 0.7 (0.02)   |
| <b>AFV Pat.</b> | Diastolic dysfunction       | -18.2 (0.38) |
|                 | Hx of surgery               | 6.7 (0.81)   |
|                 | Aortic root dim. z-sc.      | -1.2 (0.85)  |
|                 | Asc. aorta dim. z-sc.       | 13.7 (0.36)  |
|                 | Adjusted R <sup>2</sup> (q) | 0.78 (0.31)  |
